# Supplementary material for: Multivariate Analysis Revealed Ultrasonic-Assisted Extraction Improves Anti-Melanoma Activity of Non-Flavonoid Compounds in Indonesian Brown Algae Ethanol Extract
Source: MDPI journal article supplement (doi:10.3390/molecules27217509), 2022-11-03
Supplement: s1 [file s1]

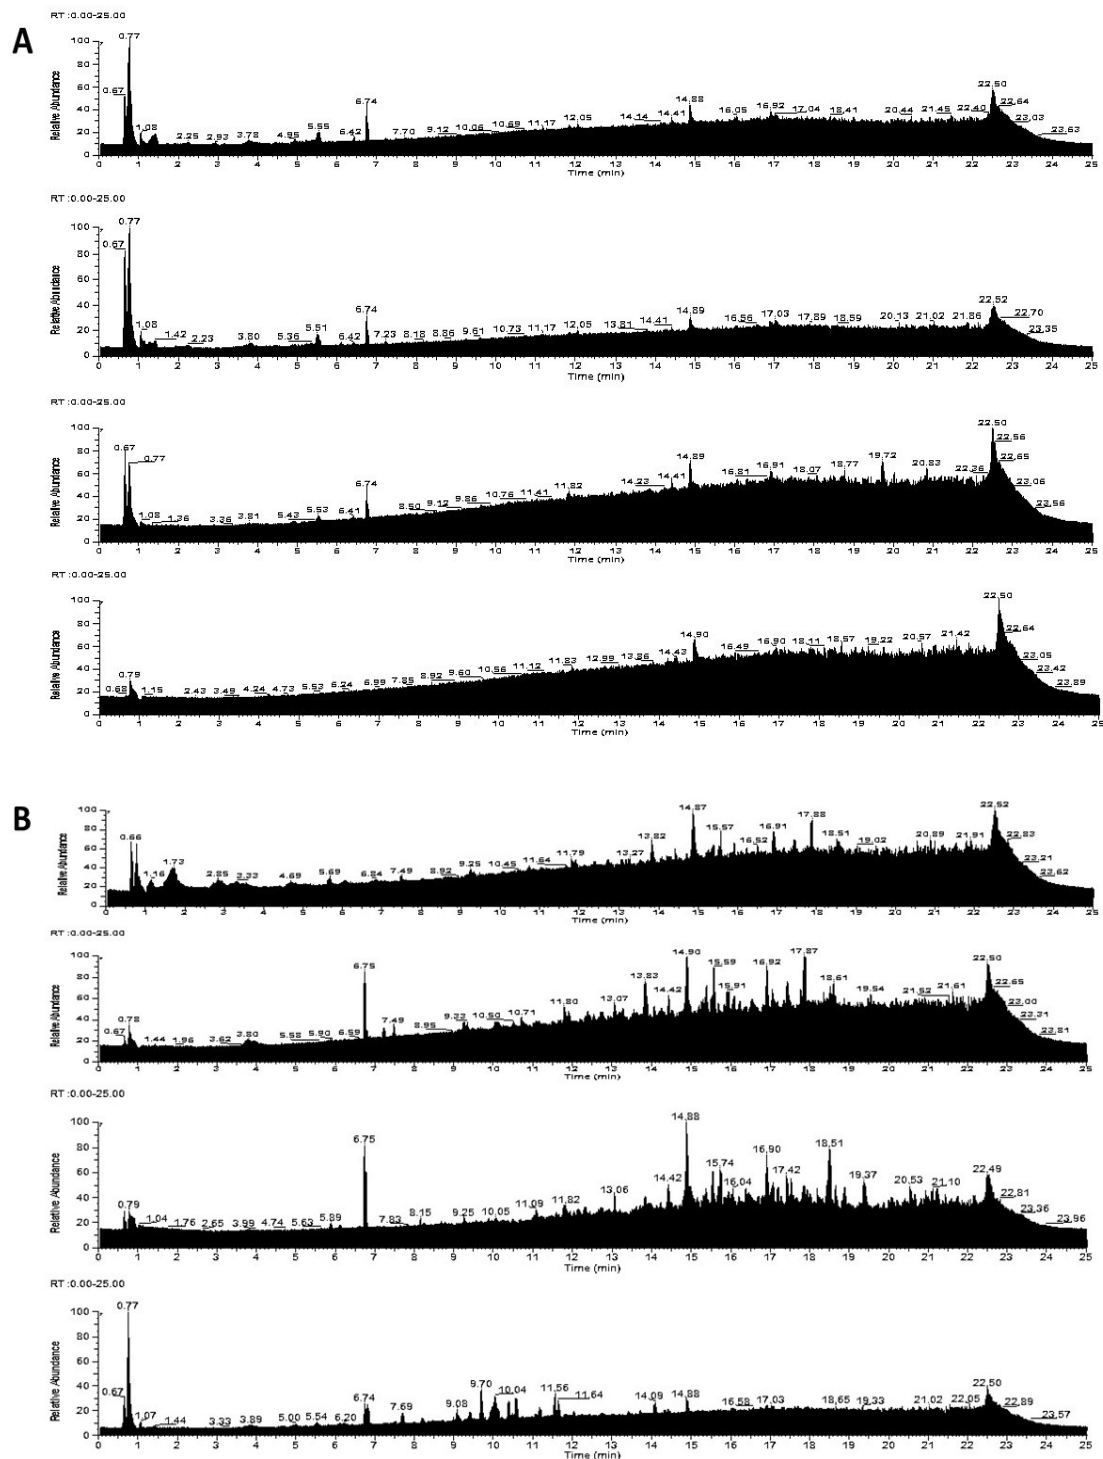

**Figure S1.** Chromatogram of *Sargassum polycystum*, *Sargassum cristaeifolium*, *Sargassum aquifolium* and *Turbinaria ornata* (from above to below, respectively) extracts using (A) maceration (B) sonication or UAE

**Table S1.** (a) Compounds in *Sargassum polycystum* extracted with maceration method detected by LC-HRMS.

| Compound                                                                      | Abbreviation | Formula        | RT (min) | Peak Area (intensity)  |
|-------------------------------------------------------------------------------|--------------|----------------|----------|------------------------|
| Nylon cyclic dimer                                                            | NCD          | C12 H22 N2 O2  | 5.89     | 2.25 x 10 <sup>8</sup> |
| 12-oxo phytodienoic acid                                                      | 12-oxPA      | C18 H28 O3     | 8.15     | 1.11 x 10 <sup>8</sup> |
| 5-Pentylresorcinol                                                            | 5-Pres       | C11 H16 O2     | 9.25     | 3.03 x 10 <sup>8</sup> |
| 1-Tetradecylamine                                                             | 1-TDAm       | C14 H31 N      | 10.06    | 2.9 x 10 <sup>8</sup>  |
| Lauramide                                                                     | LAm          | C12 H25 N O    | 11.83    | 6.96 x 10 <sup>8</sup> |
| Cetrimonium                                                                   | CTM          | C19 H41 N      | 12.36    | 1.13 x 10 <sup>8</sup> |
| Octadec-9-ynoic acid                                                          | Octadec-9-YA | C18 H32 O2     | 14.22    | 3.52 x 10 <sup>8</sup> |
| Hexadecanamide                                                                | HDAm         | C16 H33 N O    | 14.42    | 10.9 x 10 <sup>8</sup> |
| Oleamide                                                                      | OAm          | C18 H35 N O    | 14.88    | 5.72 x 10 <sup>8</sup> |
| (2β,5β,9xi,22R)-2,14,22,25- Tetrahydroxycholest-7-ene-3,6-dione               | T-7ED        | C27 H42 O6     | 14.96    | 2.89 x 10 <sup>8</sup> |
| 1-Stearoylglycerol                                                            | 1-SAG        | C21 H42 O4     | 15.56    | 5.31 x 10 <sup>8</sup> |
| Stearamide                                                                    | STAm         | C18 H37 N O    | 15.68    | 7.71 x 10 <sup>8</sup> |
| N,N-Diethyldodecanamide                                                       | N-N-DAm      | C16 H33 N O    | 15.89    | 7.25 x 10 <sup>8</sup> |
| Icosaoctaen-2-one                                                             | I-2On        | C23 H45 N4 O P | 16.04    | 2 x 10 <sup>8</sup>    |
| (3β,4α,5α)-3- Hydroxyergosta-7,24(28)-diene-4- carbaldehyde                   | H-D-4C       | C29 H46 O2     | 16.82    | 5.53 x 10 <sup>8</sup> |
| Linolenic acid ethyl ester                                                    | LAEE         | C20 H34 O2     | 17.12    | 1.03 x 10 <sup>8</sup> |
| e-Tokoferol                                                                   | e-Tokoferol  | C28 H42 O2     | 17.19    | 6.14 x 10 <sup>8</sup> |
| 2-(3-Hydroxy-3,7,11,15-tetramethylhexadecyl)-3,5,6-trimethyl-1,4-benzoquinone | 2-HTTB       | C29 H50 O3     | 18.5     | 12.8 x 10 <sup>8</sup> |
| Ceramide (d18:1/16:0)                                                         | Cer          | C34 H67 N O3   | 18.97    | 1.63 x 10 <sup>8</sup> |
| N-octodecanoylsphinganine                                                     | N-ocSP       | C36 H73 N O3   | 20.09    | 2.72 x 10 <sup>8</sup> |
| Dichloroacetic acid                                                           | DA           | C2 H2 Cl2 O2   | 22.55    | 1.19 x 10 <sup>8</sup> |

**Table S1.** (b) Compounds in *Sargassum polycystum* extracted with sonication or UAE method detected by LC-HRMS.

| Compound                                                             | Abbreviation  | Formula       | RT (min) | Peak Area (intensity)  |
|----------------------------------------------------------------------|---------------|---------------|----------|------------------------|
| Palmitic acid                                                        | PA            | C16 H32 O2    | 9.57     | 1.8 x 10 <sup>8</sup>  |
| Cetrimonium                                                          | CTM           | C19 H41 N     | 12.65    | 1.62 x 10 <sup>8</sup> |
| (±)13-HpODE                                                          | (±)13-HpODE   | C18 H32 O4    | 13.06    | 3.64 x 10 <sup>8</sup> |
| (±)11(12)-EET                                                        | (±)11(12)-EET | C20 H32 O3    | 13.06    | 8.40 x 10 <sup>8</sup> |
| Myristamide                                                          | MAm           | C14 H29 N O   | 13.18    | 1.31 x 10 <sup>8</sup> |
| Hexadecanamide                                                       | HDAm          | C16 H33 N O   | 14.41    | 1.18 x 10 <sup>8</sup> |
| Oleamide                                                             | OAm           | C18 H35 N O   | 14.88    | 60.1 x 10 <sup>8</sup> |
| (3β,5β,20xi,22R)-3,14,20,22,25- Pentahydroxycholest-7-en-6-one       | P-7-en-6-on   | C27 H44 O6    | 15.16    | 1.20 x 10 <sup>8</sup> |
| Stearamide                                                           | STAm          | C18 H37 N O   | 15.55    | 11.7 x 10 <sup>8</sup> |
| Stearoyl ethanolamide                                                | SEA           | C20 H41 N O2  | 15.92    | 3.02 x 10 <sup>8</sup> |
| Ergosterol peroxide                                                  | ErPox         | C28 H44 O3    | 15.95    | 1.32 x 10 <sup>8</sup> |
| e-Tokoferol                                                          | e-Tokoferol   | C28 H42 O2    | 17.2     | 4.74 x 10 <sup>8</sup> |
| γ-Linolenic acid ethyl ester                                         | γ-LAAE        | C20 H34 O2    | 18.39    | 4.16 x 10 <sup>8</sup> |
| Bis(3,5,5-trimethylhexyl) phthalate                                  | Bis-PH        | C26 H42 O4    | 18.4     | 2.00 x 10 <sup>8</sup> |
| Phylloquinone oxide                                                  | Pox           | C31 H46 O3    | 18.58    | 1.13 x 10 <sup>8</sup> |
| Arachidonic acid ethyl ester                                         | AAEE          | C22 H36 O2    | 19.39    | 4.08 x 10 <sup>8</sup> |
| 3-[(17Z)-13,14-Dihydroxy-17-triaconten-1-yl]-5-methyl-2(5H)-furanone | 3-DTMF        | C21 H38 N6 O3 | 20.92    | 1.20 x 10 <sup>8</sup> |

**Table S1.** (c) Compounds in *Sargassum cristaefolium* extracted with maceration method detected by LC-HRMS.

| Compound                                                                                                      | Abbreviation      | Formula      | RT (min) | Peak Area<br>(intensity) |
|---------------------------------------------------------------------------------------------------------------|-------------------|--------------|----------|--------------------------|
| Palmitic acid                                                                                                 | PA                | C16 H32 O2   | 9.56     | 1.42 x 10 <sup>8</sup>   |
| $\alpha$ -Eleostearic acid                                                                                    | $\alpha$ -EA      | C18 H30 O2   | 12.75    | 1.95 x 10 <sup>8</sup>   |
| ( $\pm$ )13-HpODE                                                                                             | ( $\pm$ )13-HpODE | C18 H32 O4   | 13.06    | 1.91 x 10 <sup>8</sup>   |
| Myristamide                                                                                                   | MAm               | C14 H29 N O  | 14.92    | 1.12 x 10 <sup>8</sup>   |
| Stearoyl ethanolamide                                                                                         | SEA               | C20 H41 N O2 | 15.92    | 2.97 x 10 <sup>8</sup>   |
| (3 $\beta$ ,4 $\alpha$ ,5 $\alpha$ )-3-Hydroxyergosta-7,24(28)-diene-4-carbaldehyde                           | 3-HDC             | C29 H46 O2   | 16.39    | 4.39 x 10 <sup>8</sup>   |
| (2S)-3-Hydroxy-2-[(9Z)-9-tetradecenoyloxy]propyl<br>(4Z,7Z,10Z,13Z,16Z,19Z)- 4,7,10,13,16,19-docosahexaenoate | 3-HTDc            | C39 H62 O5   | 17.52    | 1.74 x 10 <sup>8</sup>   |
| Bis-(2-ethylhexyl)-phthalate                                                                                  | Bis-2PH           | C24 H38 O4   | 17.86    | 5.55 x 10 <sup>8</sup>   |
| DG-(16:0/18:3(9Z,12Z,15Z)/0:0)                                                                                | DG                | C37 H66 O5   | 18.46    | 1.5 x 10 <sup>8</sup>    |
| N-[(4Z,8Z)-1,3-Dihydroxy-4,8- octadecadien-2-yl]-hexadecanamide                                               | N-1,3-DO-2HAm     | C34 H65 N O3 | 18.66    | 3.02 x 10 <sup>8</sup>   |
| 1-Palmitoyl-2-linoleoyl-sn-glycerol                                                                           | PLAG              | C37 H68 O5   | 18.88    | 1.34 x 10 <sup>8</sup>   |
| Dichloroacetic acid                                                                                           | DA                | C2 H2 Cl2 O2 | 22.54    | 1.82 x 10 <sup>8</sup>   |

**Table S1.** (d) Compounds in *Sargassum cristaeifolium* extracted with sonication or UAE method detected by LC-HRMS.

| Compound                                                                      | Abbreviation   | Formula      | RT (min) | Peak Area (intensity)  |
|-------------------------------------------------------------------------------|----------------|--------------|----------|------------------------|
| 5-Pentylresorcinol                                                            | 5-Pres         | C11 H16 O2   | 9.24     | 2.36 x 10 <sup>8</sup> |
| (10Z,14E,16E)-10,14,16-octadecatrien-12-ynoic acid                            | O-12-YA        | C18 H26 O2   | 11.93    | 3.06 x 10 <sup>8</sup> |
| Palmitoleic acid                                                              | PolA           | C16 H30 O2   | 12.29    | 6.76 x 10 <sup>8</sup> |
| (+/-)8-HEPE                                                                   | (+/-)8-HEPE    | C20 H30 O3   | 12.64    | 2.51 x 10 <sup>8</sup> |
| $\alpha$ -Eleostearic acid                                                    | $\alpha$ -ElA  | C18 H30 O2   | 12.74    | 3.73 x 10 <sup>8</sup> |
| Monoolein                                                                     | Mol            | C21 H40 O4   | 13.08    | 1.01 x 10 <sup>8</sup> |
| 15(S)-HpETE                                                                   | 15(S)-HpETE    | C20 H32 O4   | 13.34    | 1.09 x 10 <sup>8</sup> |
| Octadec-9-ynoic acid                                                          | Octadec-9-YA   | C18 H32 O2   | 15.51    | 5.43 x 10 <sup>8</sup> |
| Oleamide                                                                      | OAm            | C18 H35 N O  | 15.52    | 5.7 x 10 <sup>8</sup>  |
| Hexadecanamide                                                                | HDAm           | C16 H33 N O  | 15.68    | 1.42 x 10 <sup>8</sup> |
| 1-Stearoylglycerol                                                            | 1-SAG          | C21 H42 O4   | 15.74    | 1.84 x 10 <sup>8</sup> |
| (2S)-2-Hydroxy- $\beta$ , $\beta$ -carotene-4,4'-dione                        | 2-HBBCD        | C40 H52 O3   | 16.39    | 2.65 x 10 <sup>8</sup> |
| 3-Hydroxy-4-methylcholesta-8,24-diene-4-carbaldehyde                          | 3-HMDC         | C29 H46 O2   | 16.45    | 4.3 x 10 <sup>8</sup>  |
| Fucoxanthin                                                                   | Fcx            | C42 H58 O6   | 17.03    | 2.48 x 10 <sup>8</sup> |
| Stearamide                                                                    | STAm           | C18 H37 N O  | 17.06    | 1.09 x 10 <sup>8</sup> |
| 2-Hydroxy-3-(tetradecanoyloxy)-propyl-(5Z,8Z,11Z)-5,8,11-icosatrienoate       | 2-H-Ico        | C37 H66 O5   | 17.27    | 2.39 x 10 <sup>8</sup> |
| 1-myristoyl-2-oleoyl-sn-glycerol                                              | 1-MOAG         | C35 H66 O5   | 16.39    | 2.02 x 10 <sup>8</sup> |
| 2,3-dihydroxypropyl 12- methyltridecanoate                                    | 2,3-D-12-M     | C17 H34 O4   | 17.32    | 6.33 x 10 <sup>8</sup> |
| Bis(2-ethylhexyl) phthalate                                                   | Bis-2PH        | C24 H38 O4   | 17.86    | 3.56 x 10 <sup>8</sup> |
| $\gamma$ -Linolenic acid ethyl ester                                          | $\gamma$ -LAEE | C20 H34 O2   | 17.98    | 18.7 x 10 <sup>8</sup> |
| 1-Oleoyl-3-palmitoyl-rac-glycerol                                             | OPRG           | C37 H70 O5   | 18.28    | 5.53 x 10 <sup>8</sup> |
| 2-(3-Hydroxy-3,7,11,15-tetramethylhexadecyl)-3,5,6-trimethyl-1,4-benzoquinone | 2-HTTB         | C29 H50 O3   | 18.5     | 7.2 x 10 <sup>8</sup>  |
| Trilaurylamine                                                                | TAm            | C36 H75 N    | 18.65    | 1.08 x 10 <sup>8</sup> |
| N-eicosanoylsphinganine                                                       | N-ESP          | C38 H77 N O3 | 21.22    | 9.46 x 10 <sup>8</sup> |

**Table S1.** (e) Compounds in *Sargassum aquifolium* extracted with maceration method detected by LC-HRMS.

| Compound                                                               | Abbreviation  | Formula     | RT (min) | Peak Area (intensity) |
|------------------------------------------------------------------------|---------------|-------------|----------|-----------------------|
| Isometheptene                                                          | IMP           | C9 H19 N    | 0.8      | 1.4 x 10 <sup>8</sup> |
| Hexyl 2-furoate                                                        | H-2F          | C11 H16 O3  | 6.12     | 2.1 x 10 <sup>8</sup> |
| 3-deoxyestrone                                                         | 3-DE          | C18 H22 O   | 11.09    | 1.6 x 10 <sup>8</sup> |
| Stearidonic acid                                                       | SA            | C18 H28 O2  | 12.31    | 3 x 10 <sup>8</sup>   |
| All trans retinal (Retinols)                                           | ATr           | C20 H28 O   | 13.07    | 4.1 x 10 <sup>8</sup> |
| (±)11(12)-EET                                                          | (±)11(12)-EET | C20 H32 O3  | 13.27    | 1.4 x 10 <sup>8</sup> |
| 4,7-diphenyl[1,10]phenanthroline                                       | 4,7-DP        | C24 H16 N2  | 14.14    | 1.7 x 10 <sup>8</sup> |
| α-Linolenic acid                                                       | α-LA          | C18 H30 O2  | 14.73    | 1.5 x 10 <sup>8</sup> |
| Eicosapentaenoic acid                                                  | EA            | C20 H30 O2  | 14.83    | 1.6 x 10 <sup>8</sup> |
| Arachidonic acid                                                       | AA            | C20 H32 O2  | 15.37    | 4.9 x 10 <sup>8</sup> |
| Fucoxanthin                                                            | Fcx           | C42 H58 O6  | 16.44    | 1.1 x 10 <sup>8</sup> |
| (2S)-2-Hydroxy-beta,beta-carotene-4,4'-dione                           | 2-HBBCD       | C40 H52 O3  | 16.46    | 2.3 x 10 <sup>8</sup> |
| Erucamide                                                              | ECAm          | C22 H43 N O | 17.03    | 3.8 x 10 <sup>8</sup> |
| Stearamide                                                             | STAm          | C18 H37 N O | 17.04    | 1.3 x 10 <sup>9</sup> |
| (3beta,4alpha,5alpha)-3- hydroxycholesta-7,24-diene-4-carbaldehyde     | 3-HDC         | C28 H44 O2  | 17.43    | 9.7 x 10 <sup>8</sup> |
| 1-myristoyl-3-palmitoyl-rac-glycerol                                   | MPG           | C33 H64 O5  | 17.55    | 3.5 x 10 <sup>8</sup> |
| (2S)-3-Hydroxy-2-(tetradecanoyloxy)propyl-                             |               |             |          | 1.1 x 10 <sup>8</sup> |
| (4Z,7Z,10Z,13Z,16Z,19Z)- 4,7,10,13,16,19-docosahexaenoate              | (2S)-HPD      | C39 H64 O5  | 17.57    |                       |
| Bis(3,5,5-trimethylhexyl) phthalate                                    | BisPH         | C26 H42 O4  | 17.82    | 1.4 x 10 <sup>8</sup> |
| 3-[(19Z)-15,16-dihydroxy-19-dotriaconten-1-yl]-5-methyl-2(5H)-furanone | 3-DMF         | C37 H68 O4  | 18.42    | 2.3 x 10 <sup>8</sup> |
| γ-Linolenic acid ethyl ester                                           | γ-LAAE        | C20 H34 O2  | 18.5     | 5.6 x 10 <sup>8</sup> |
| 1-Oleoyl-3-Palmitoyl-Rac-Glycerol                                      | OPRG          | C37 H70 O5  | 18.65    | 3.3 x 10 <sup>8</sup> |
| 2S)-1-Hydroxy-3-{[(9Z)-18-hydroxy-9-octadecenoyl]oxy}-2-propanyl       |               |             |          | 1.4 x 10 <sup>8</sup> |
| (9Z,12Z)-18-hydroxy-9,12-octadecadienoate                              | (2S)-HPO      | C39 H70 O7  | 18.88    |                       |
| 4-(2-Hydroxyethyl)phenyl hydrogen sulfate                              | 4-HHS         | C8 H10 O5 S | 19.39    | 1.8 x 10 <sup>9</sup> |

**Table S1.** (f) Compounds in *Sargassum aquifolium* extracted with sonication or UAE method detected by LC-HRMS.

| Compound                                                                                                | Abbreviation   | Formula       | RT (min) | Peak Area (intensity) |
|---------------------------------------------------------------------------------------------------------|----------------|---------------|----------|-----------------------|
| Isometheptene                                                                                           | IMP            | C9 H19 N      | 0.8      | 1.6 x 10 <sup>8</sup> |
| Hexyl-2-furoate                                                                                         | H-2F           | C11 H16 O3    | 6.1      | 2.3 x 10 <sup>8</sup> |
| Sphinganine                                                                                             | SG             | C18 H39 N O2  | 9.89     | 1.0 x 10 <sup>8</sup> |
| Bis(2-ethylhexyl) amine                                                                                 | Bis-Am         | C16 H35 N     | 11.25    | 1.1 x 10 <sup>8</sup> |
| 2-arachidonoylglycerol                                                                                  | 2-AG           | C23 H38 O4    | 14.49    | 1.3 x 10 <sup>8</sup> |
| $\alpha$ -Linolenic acid                                                                                | $\alpha$ -LA   | C18 H30 O2    | 14.72    | 2 x 10 <sup>8</sup>   |
| Eicosapentaenoic acid                                                                                   | EA             | C20 H30 O2    | 14.83    | 2.2 x 10 <sup>8</sup> |
| 3-[18-(1-Hydroxy-3-methoxy-3-oxopropyl)-3,7,12,17-tetramethyl-8,13-divinyl-2-porphyrinyl]propanoic acid | 3-PA           | C35 H36 N4 O5 | 15.07    | 2.5 x 10 <sup>8</sup> |
| (2S)-2-Hydroxy- $\beta,\beta$ -carotene-4,4'-dione                                                      | (2S)-HCD       | C40 H52 O3    | 16.46    | 1.5 x 10 <sup>8</sup> |
| 3 $\beta$ ,4 $\alpha$ ,5 $\alpha$ )-3- Hydroxycholesta-7,24-diene-4- carbaldehyde                       | 3-H-7,24-DC    | C28 H44 O2    | 17.43    | 6.6 x 10 <sup>8</sup> |
| Arachidonic acid ethyl ester                                                                            | AAEE           | C22 H36 O2    | 18.65    | 1.1 x 10 <sup>8</sup> |
| FF-MAS                                                                                                  | FF-MAS         | C29 H46 O     | 18.83    | 1.4 x 10 <sup>9</sup> |
| $\gamma$ -Linolenic acid ethyl ester                                                                    | $\gamma$ -LAAE | C20 H34 O2    | 18.88    | 1.2 x 10 <sup>9</sup> |
| 4-(2-Hydroxyethyl)phenyl hydrogen sulfate                                                               | 4-HPHS         | C8 H10 O5 S   | 22.54    | 1.7 x 10 <sup>9</sup> |

**Table S1.** (g) Compounds in *Turbinaria ornata* extracted with maceration method detected by LC-HRMS.

| Compound                                                                                                    | Abbreviation   | Formula     | RT (min) | Peak Area (intensity) |
|-------------------------------------------------------------------------------------------------------------|----------------|-------------|----------|-----------------------|
| (+/-)8-HEPE                                                                                                 | (+/-)8-HEPE    | C20 H30 O3  | 12.64    | 2 x 10 <sup>8</sup>   |
| Myristamide                                                                                                 | MAM            | C14 H29 N O | 13.18    | 1 x 10 <sup>8</sup>   |
| Dibutyl phthalate                                                                                           | DBP            | C16 H22 O4  | 13.83    | 1 x 10 <sup>8</sup>   |
| 2-Arachidonoyl glycerol                                                                                     | 2-AG           | C23 H38 O4  | 14.49    | 1 x 10 <sup>8</sup>   |
| Oleamide                                                                                                    | OAm            | C18 H35 N O | 15.52    | 6 x 10 <sup>8</sup>   |
| (2S)-2-Hydroxy- $\beta,\beta$ -carotene-4,4'-dione                                                          | (2S)-HCD       | C40 H52 O3  | 15.75    | 4 x 10 <sup>8</sup>   |
| (2S)-2-[(3E,7E,11E)-13-Hydroxy-4,8,12-trimethyl-3,7,11-tridecatrien-1-yl]-2,7,8-trimethyl-6-chromanol       | (2S)-HTTC      | C28 H42 O3  | 15.86    | 2 x 10 <sup>8</sup>   |
| 5-Methyl-3-{2,6,8,10,13-pentahydroxy-13-[5-(1-hydroxytridecyl)tetrahydro-2-furanyl]tridecyl}-2(5H)-furanone | 5-MPHFF        | C35 H64 O9  | 16.39    | 1 x 10 <sup>8</sup>   |
| PM-Toxin A                                                                                                  | PM-TA          | C33 H60 O8  | 16.51    | 1 x 10 <sup>8</sup>   |
| Erucamide                                                                                                   | ECAM           | C22 H43 N O | 16.91    | 2 x 10 <sup>8</sup>   |
| 1-(9Z-hexadecenoyl)-2-(9Z,12Z-octadecadienoyl)-sn-glycerol                                                  | 1-HOG          | C37 H66 O5  | 17.08    | 2 x 10 <sup>8</sup>   |
| 2,3-dihydroxypropyl 12- methyltridecanoate                                                                  | 2,3-DM         | C17 H34 O4  | 17.57    | 2 x 10 <sup>8</sup>   |
| $\gamma$ -Linolenic acid ethyl ester                                                                        | $\gamma$ -LAEE | C20 H34 O2  | 18.18    | 6 x 10 <sup>8</sup>   |
| FF-MAS                                                                                                      | FF-MAS         | C29 H46 O   | 18.83    | 6 x 10 <sup>8</sup>   |
| Arachidonic acid ethyl ester                                                                                | AAEE           | C22 H36 O2  | 19.39    | 2 x 10 <sup>8</sup>   |



**Table S1.** (h) Compounds in *Turbinaria ornata* extracted with sonication or UAE method detected by LC-HRMS.

| Compound                                                                                                          | Abbreviation | Formula      | RT (min) | Peak Area (intensity)   |
|-------------------------------------------------------------------------------------------------------------------|--------------|--------------|----------|-------------------------|
| 1-Tetradecylamine                                                                                                 | 1-TDAm       | C14 H31 N    | 10,09    | 3.68 x 10 <sup>8</sup>  |
| 3-Deoxyestrone                                                                                                    | 3-Doxy       | C18 H22 O    | 11,09    | 1.9 x 10 <sup>8</sup>   |
| N-Methyldioctylamine                                                                                              | N-MDAm       | C17 H37 N    | 11,41    | 1.48 x 10 <sup>8</sup>  |
| Lauramide                                                                                                         | LAm          | C12 H25 N O  | 11,82    | 6.95 x 10 <sup>8</sup>  |
| All trans retinal (Retinols)                                                                                      | ATr          | C20 H28 O    | 13,26    | 1.27 x 10 <sup>8</sup>  |
| Arachidonic acid                                                                                                  | AA           | C20 H32 O2   | 13.36    | 5.59 x 10 <sup>8</sup>  |
| (2S)-2-[(3E,7E,11E)-13-Hydroxy-4,8,12-trimethyl-3,7,11-tridecatrien-1-yl]-2,7,8-trimethyl-6-chromanol             | (2S)-HTTTC   | C28 H42 O3   | 15.86    | 4.52 x 10 <sup>8</sup>  |
| Callystatin A                                                                                                     | CstatA       | C29 H44 O4   | 16.02    | 0.213 x 10 <sup>8</sup> |
| (3β,4α,5α)-3- Hydroxyergosta-7,24(28)-diene-4-carbaldehyde                                                        | 3-HDC        | C29 H46 O2   | 16.82    | 4.25 x 10 <sup>8</sup>  |
| Erucamide                                                                                                         | ECAm         | C22 H43 N O  | 16.91    | 21.29                   |
| 3-{ 13-Hydroxy-13-[5-(1-hydroxypentadecyl)tetrahydro-2-furanyl]tridecyl}-5-methyl-2(5H)- furanone)                | 3-HHTFMF     | C37 H68 O5   | 17.53    | 1.14 x 10 <sup>8</sup>  |
| Arachidonic acid ethyl ester                                                                                      | AAEE         | C22 H36 O2   | 18,29    | 35.9 x 10 <sup>8</sup>  |
| 1-Oleoyl-3-Palmitoyl-Rac-Glycerol                                                                                 | OPRG         | C37 H70 O5   | 19,39    | 5.79 x 10 <sup>8</sup>  |
| (2S)-3-Hydroxy-2- {[9-(3-methyl-5-pentyl-2-furyl)-nonanoyl]-oxy-propyl-11-(3-methyl-5-propyl-2-furyl)-undecanoate | 3-HPD        | C41 H68 O7   | 20,12    | 1.78 x 10 <sup>8</sup>  |
| Dichloroacetic acid                                                                                               | DCA          | C2 H2 Cl2 O2 | 22,55    | 22.08 x 10 <sup>8</sup> |
